# Supplementary material for: Mass spectrometry imaging (MSI) of fresh bones using infrared matrix-assisted laser desorption electrospray ionization (IR-MALDESI)
Source: Royal Society of Chemistry journal article supplement (doi:10.1039/c9ay01886g), 2019-01-01
Supplement: c9ay01886g1.pdf [file c9ay01886g1.pdf]

1                                   **Mass Spectrometry Imaging (MSI) of Fresh Bones using**  
2                                   **Matrix-Assisted Laser Desorption Electrospray Ionization (IR-MALDESI)**

3  
4  
5   Sitora Khodjanizayova<sup>a</sup>, Nicholas J. Hanne<sup>b</sup>, Jacqueline H. Cole<sup>b</sup>, and \*David C. Muddiman<sup>a,c</sup>

6  
7                                   <sup>a</sup> *FTMS Laboratory for Human Health Research, Department of Chemistry;*

8   <sup>b</sup> *Joint Department of Biomedical Engineering, North Carolina State University and University*  
9                                   *of North Carolina at Chapel Hill; and*

10   <sup>c</sup> *Molecular Education, Technology, and Research Innovation Center (METRIC), North*  
11                                   *Carolina State University, Raleigh, NC 27695 USA*

12  
13                                   **Submitted to: *Analytical Methods* (Technical Note)**

14                                   **Submitted on: September 1, 2019**

15                                   **Revised on: October 21, 2019**

16 **Supplementary Information:** 22 Pages / 1 Supplementary Figure / 1 Supplementary Table

17  
18  
19  
20  
21  
22  
23 **\*Author for Correspondence**

24 David C. Muddiman, Ph.D.

25 FTMS Laboratory for Human Health Research, Department of Chemistry and  
26 Molecular Education, Technology, and Research Innovation Center (METRIC)

27 North Carolina State University

28 Raleigh, North Carolina 27695

29 Phone: 919-513-0084

30 Email: [dcmuddim@ncsu.edu](mailto:dcmuddim@ncsu.edu)

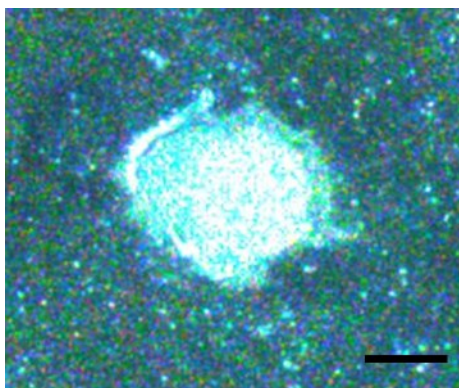

**Supplemental Figure 1.** Optical image of spot ablated from ZAP-IT paper at room temperature. Scale bar is 100  $\mu\text{m}$ .

31

32 **Supplementary Table 1.** Putative elemental compositions annotated in METASPACE  
 33 (<https://metaspace2020.eu/project/Khodjaniazova-2019-bones>) using Human Metabolome Database for  
 34 endogenous species.

| Healthy     |        |            | Stroke      |        |            |
|-------------|--------|------------|-------------|--------|------------|
| Formula     | Adduct | <i>m/z</i> | Formula     | Adduct | <i>m/z</i> |
| C40H80NO8P  | M+H    | 734.5694   | C40H80NO8P  | M+H    | 734.5694   |
| C19H38O2    | M+H    | 299.2944   | C37H68O4    | M+H    | 577.5190   |
| C18H36O2    | M+H    | 285.2788   | C20H32O2    | M+H    | 305.2475   |
| C37H68O4    | M+H    | 577.5190   | C42H82NO8P  | M+H    | 760.5850   |
| C20H32O2    | M+H    | 305.2475   | C27H44O     | M+H    | 385.3465   |
| C27H44O     | M+H    | 385.3465   | C48H84NO8P  | M+H    | 834.6007   |
| C18H34O2    | M+H    | 283.2631   | C35H66O4    | M+H    | 551.5033   |
| C30H50      | M+H    | 411.3985   | C39H79N2O6P | M+H    | 703.5748   |
| C45H78NO8P  | M+H    | 792.5537   | C45H78NO8P  | M+H    | 792.5537   |
| C10H12N4O5  | M+K    | 307.0439   | C37H71O8P   | M+K    | 713.4518   |
| C35H66O4    | M+H    | 551.5033   | C30H50      | M+H    | 411.3985   |
| C42H82NO8P  | M+H    | 760.5850   | C35H64O4    | M+H    | 549.4877   |
| C39H79N2O6P | M+H    | 703.5748   | C24H50NO7P  | M+H    | 496.3397   |
| C22H26O6    | M+K    | 425.1361   | C10H17N3O6S | M+H    | 308.0910   |
| C18H30O     | M+H    | 263.2369   | C26H33NO6   | M+H    | 456.2380   |
| C18H34O4    | M+H    | 315.2529   | C22H32O2    | M+H    | 329.2475   |
| C24H50NO7P  | M+H    | 496.3397   | C23H45NO4   | M+H    | 400.3421   |
| C29H46O3    | M+Na   | 465.3339   | C46H80NO8P  | M+H    | 806.5694   |
| C48H84NO8P  | M+H    | 834.6007   | C44H80NO8P  | M+H    | 782.5694   |
| C35H64O4    | M+H    | 549.4877   | C46H84NO8P  | M+H    | 810.6007   |
| C22H32O2    | M+H    | 329.2475   | C43H74NO8P  | M+H    | 764.5224   |
| C10H17N3O6S | M+H    | 308.0910   | C18H13NO4   | M+H    | 308.0917   |
| C15H10N2O2  | M+H    | 251.0815   | C37H74NO8P  | M+H    | 692.5224   |

|             |     |          |             |     |          |
|-------------|-----|----------|-------------|-----|----------|
| C41H83N2O6P | M+H | 731.6061 | C27H44O2    | M+H | 401.3414 |
| C22H45NO    | M+H | 340.3574 | C37H66O4    | M+H | 575.5033 |
| C43H74NO8P  | M+H | 764.5224 | C27H42O     | M+H | 383.3308 |
| C20H30O2    | M+H | 303.2318 | C42H84NO7P  | M+H | 746.6058 |
| C37H66O4    | M+H | 575.5033 | C29H48O3    | M+H | 445.3676 |
| C46H80NO8P  | M+H | 806.5694 | C25H47NO4   | M+H | 426.3577 |
| C26H54NO7P  | M+H | 524.3710 | C42H80NO8P  | M+H | 758.5694 |
| C18H13NO4   | M+H | 308.0917 | C26H54NO7P  | M+H | 524.3710 |
| C42H84NO7P  | M+H | 746.6058 | C22H34O2    | M+H | 331.2631 |
| C37H74NO8P  | M+H | 692.5224 | C38H76NO8P  | M+H | 706.5381 |
| C46H84NO8P  | M+H | 810.6007 | C20H30O2    | M+H | 303.2318 |
| C27H44O2    | M+H | 401.3414 | C40H78NO8P  | M+H | 732.5537 |
| C44H80NO8P  | M+H | 782.5694 | C43H78NO8P  | M+H | 768.5537 |
| C29H57NO4   | M+H | 484.4360 | C41H83N2O6P | M+H | 731.6061 |
| C22H34O2    | M+H | 331.2631 | C44H82NO7P  | M+H | 768.5901 |
| C27H46O2    | M+H | 403.3570 | C27H46O2    | M+H | 403.3570 |
| C27H42O     | M+H | 383.3308 | C44H84NO8P  | M+H | 786.6007 |
| C21H40O3    | M+H | 341.3050 | C47H93N2O6P | M+H | 813.6844 |
| C16H12N2O2  | M+H | 265.0971 | C18H39N     | M+H | 270.3155 |
| C42H80NO8P  | M+H | 758.5694 | C35H62O4    | M+H | 547.4720 |
| C23H45NO4   | M+H | 400.3421 | C18H35NO    | M+H | 282.2791 |
| C26H33NO6   | M+H | 456.2380 | C12H17N3O4  | M+H | 268.1291 |
| C37H64O4    | M+H | 573.4877 | C41H74NO7P  | M+H | 724.5275 |
| C35H62O4    | M+H | 547.4720 | C37H64O4    | M+H | 573.4877 |
| C44H82NO7P  | M+H | 768.5901 | C42H82NO7P  | M+H | 744.5901 |
| C43H78NO8P  | M+H | 768.5537 | C43H74NO7P  | M+H | 748.5275 |
| C18H35NO    | M+H | 282.2791 | C42H78NO8P  | M+H | 756.5537 |
| C44H84NO8P  | M+H | 786.6007 | C39H74NO8P  | M+H | 716.5224 |
| C40H78NO8P  | M+H | 732.5537 | C46H84NO7P  | M+H | 794.6058 |
| C47H93N2O6P | M+H | 813.6844 | C46H82NO8P  | M+H | 808.5850 |
| C38H76NO8P  | M+H | 706.5381 | C22H35NO2   | M+H | 346.2740 |
| C20H35NO2   | M+H | 322.2740 | C43H78NO7P  | M+H | 752.5588 |
| C20H30O     | M+H | 287.2369 | C41H78NO8P  | M+H | 744.5537 |
| C43H74NO7P  | M+H | 748.5275 | C44H78NO8P  | M+H | 780.5537 |
| C29H48O3    | M+H | 445.3676 | C46H78NO8P  | M+H | 804.5537 |
| C42H78NO8P  | M+H | 756.5537 | C48H82NO8P  | M+H | 832.5850 |
| C42H82NO7P  | M+H | 744.5901 | C21H39O6P   | M+H | 419.2557 |
| C34H67NO3   | M+H | 538.5193 | C12H20N4O3  | M+H | 269.1608 |
| C46H82NO8P  | M+H | 808.5850 | C36H71NO3   | M+H | 566.5506 |
| C21H39O6P   | M+H | 419.2557 | C45H69O8P   | M+H | 769.4802 |
| C34H65NO3   | M+H | 536.5037 | C21H40O3    | M+H | 341.3050 |

|             |     |          |             |     |          |
|-------------|-----|----------|-------------|-----|----------|
| C21H42O4    | M+H | 359.3155 | C26H52NO6P  | M+H | 506.3605 |
| C21H36O3    | M+H | 337.2737 | C39H76NO8P  | M+H | 718.5381 |
| C44H78NO8P  | M+H | 780.5537 | C22H36O2    | M+H | 333.2788 |
| C39H74NO8P  | M+H | 716.5224 | C43H76NO8P  | M+H | 766.5381 |
| C44H82NO8P  | M+H | 784.5850 | C44H76NO8P  | M+H | 778.5381 |
| C46H78NO8P  | M+H | 804.5537 | C10H14N5O7P | M+H | 348.0703 |
| C48H82NO8P  | M+H | 832.5850 | C23H48NO7P  | M+H | 482.3241 |
| C24H40O4    | M+H | 393.2999 | C44H82NO8P  | M+H | 784.5850 |
| C39H76NO8P  | M+H | 718.5381 | C39H69O8P   | M+H | 697.4802 |
| C46H84NO7P  | M+H | 794.6058 | C55H98O6    | M+H | 855.7436 |
| C21H40O4    | M+H | 357.2999 | C41H80NO8P  | M+H | 746.5694 |
| C57H100O6   | M+H | 881.7592 | C45H76NO8P  | M+H | 790.5381 |
| C41H74NO7P  | M+H | 724.5275 | C45H91N2O6P | M+H | 787.6687 |
| C43H78NO7P  | M+H | 752.5588 | C40H80NO7P  | M+H | 718.5745 |
| C41H78NO8P  | M+H | 744.5537 | C25H49NO4   | M+H | 428.3734 |
| C39H69O8P   | M+H | 697.4802 | C20H35NO2   | M+H | 322.2740 |
| C55H98O6    | M+H | 855.7436 | C42H84NO8P  | M+H | 762.6007 |
| C12H17N3O4  | M+H | 268.1291 | C34H65NO3   | M+H | 536.5037 |
| C22H35NO2   | M+H | 346.2740 | C41H74NO8P  | M+H | 740.5224 |
| C48H80NO8P  | M+H | 830.5694 | C13H24N4O3  | M+H | 285.1921 |
| C55H100O6   | M+H | 857.7592 | C46H86NO7P  | M+H | 796.6214 |
| C44H76NO8P  | M+H | 778.5381 | C26H46O6    | M+H | 455.3367 |
| C39H70O5    | M+H | 619.5296 | C30H58O4S   | M+H | 515.4128 |
| C53H96O6    | M+H | 829.7279 | C11H18N4O3  | M+H | 255.1451 |
| C40H80NO7P  | M+H | 718.5745 | C57H100O6   | M+H | 881.7592 |
| C41H71O8P   | M+H | 723.4959 | C40H76NO8P  | M+H | 730.5381 |
| C43H76NO8P  | M+H | 766.5381 | C41H78NO7P  | M+H | 728.5588 |
| C45H76NO8P  | M+H | 790.5381 | C44H86NO7P  | M+H | 772.6214 |
| C59H102O6   | M+H | 907.7749 | C27H44O3    | M+H | 417.3363 |
| C22H36O2    | M+H | 333.2788 | C27H45O5    | M+H | 450.3339 |
| C46H80NO7P  | M+H | 790.5745 | C55H96O6    | M+H | 853.7279 |
| C46H86NO7P  | M+H | 796.6214 | C55H100O6   | M+H | 857.7592 |
| C26H52NO6P  | M+H | 506.3605 | C48H80NO8P  | M+H | 830.5694 |
| C45H69O8P   | M+H | 769.4802 | C27H42O3    | M+H | 415.3206 |
| C27H45O5    | M+H | 450.3339 | C27H46O     | M+H | 387.3621 |
| C45H91N2O6P | M+H | 787.6687 | C41H71O8P   | M+H | 723.4959 |
| C26H48O5    | M+H | 441.3574 | C42H76NO8P  | M+H | 754.5381 |
| C36H73NO3   | M+H | 568.5663 | C53H92O7    | M+H | 841.6915 |
| C50H82NO8P  | M+H | 856.5850 | C47H95N2O6P | M+H | 815.7000 |
| C22H36O4    | M+H | 365.2686 | C53H96O6    | M+H | 829.7279 |
| C12H20N4O3  | M+H | 269.1608 | C48H78NO8P  | M+H | 828.5537 |

|               |     |          |             |     |          |
|---------------|-----|----------|-------------|-----|----------|
| C47H82NO8P    | M+H | 820.5850 | C57H98O6    | M+H | 879.7436 |
| C26H50O5      | M+H | 443.3731 | C47H82NO8P  | M+H | 820.5850 |
| C27H44O3      | M+H | 417.3363 | C29H50O2    | M+H | 431.3883 |
| C26H42O       | M+H | 371.3308 | C18H33NO    | M+H | 280.2635 |
| C44H86NO8P    | M+H | 788.6163 | C44H80NO7P  | M+H | 766.5745 |
| C55H96O6      | M+H | 853.7279 | C55H94O6    | M+H | 851.7123 |
| C42H84NO8P    | M+H | 762.6007 | C21H41NO4   | M+H | 372.3108 |
| C27H53NO4     | M+H | 456.4047 | C43H76NO7P  | M+H | 750.5432 |
| C10H14N5O7P   | M+H | 348.0703 | C44H86NO8P  | M+H | 788.6163 |
| C25H47NO4     | M+H | 426.3577 | C44H85NO11S | M+H | 836.5916 |
| C47H76NO8P    | M+H | 814.5381 | C21H40O4    | M+H | 357.2999 |
| C44H84NO6P    | M+H | 754.6109 | C39H78NO8P  | M+H | 720.5537 |
| C46H82NO7P    | M+H | 792.5901 | C44H84NO6P  | M+H | 754.6109 |
| C41H74NO8P    | M+H | 740.5224 | C59H102O6   | M+H | 907.7749 |
| C36H71NO3     | M+H | 566.5506 | C21H36O3    | M+H | 337.2737 |
| C47H73O8P     | M+H | 797.5115 | C34H67NO3   | M+H | 538.5193 |
| C11H18N4O3    | M+H | 255.1451 | C47H80NO8P  | M+H | 818.5694 |
| C39H68O5      | M+H | 617.5139 | C28H48O5    | M+H | 465.3574 |
| C47H95N2O6P   | M+H | 815.7000 | C37H72NO8P  | M+H | 690.5068 |
| C30H58O4S     | M+H | 515.4128 | C45H78NO7P  | M+H | 776.5588 |
| C53H92O7      | M+H | 841.6915 | C46H80NO7P  | M+H | 790.5745 |
| C57H102O6     | M+H | 883.7749 | C57H96O6    | M+H | 877.7279 |
| C44H80NO7P    | M+H | 766.5745 | C47H78NO8P  | M+H | 816.5537 |
| C25H49NO4     | M+H | 428.3734 | C44H84NO7P  | M+H | 770.6058 |
| C27H46O       | M+H | 387.3621 | C13H17N3O4  | M+H | 280.1291 |
| C41H80NO8P    | M+H | 746.5694 | C22H39NO2   | M+H | 350.3053 |
| C20H32N6O12S2 | M+H | 613.1592 | C43H69O8P   | M+H | 745.4802 |
| C44H86NO7P    | M+H | 772.6214 | C13H20N2O3  | M+H | 253.1546 |
| C27H42O3      | M+H | 415.3206 | C41H76NO8P  | M+H | 742.5381 |
| C42H76NO8P    | M+H | 754.5381 | C57H102O6   | M+H | 883.7749 |
| C57H98O6      | M+H | 879.7436 | C43H80NO8P  | M+H | 770.5694 |
| C40H76NO8P    | M+H | 730.5381 | C16H21N3O3S | M+H | 336.1376 |
| C43H76NO7P    | M+H | 750.5432 | C41H69O8P   | M+H | 721.4802 |
| C26H52NO7P    | M+H | 522.3554 | C59H98O6    | M+H | 903.7436 |
| C19H38O4      | M+H | 331.2842 | C50H82NO8P  | M+H | 856.5850 |
| C45H78NO7P    | M+H | 776.5588 | C8H20NO6P   | M+H | 258.1101 |
| C42H80NO7P    | M+H | 742.5745 | C46H82NO7P  | M+H | 792.5901 |
| C59H100O6     | M+H | 905.7592 | C26H40O     | M+H | 369.3152 |
| C43H82NO8P    | M+H | 772.5850 | C14H19N3O4  | M+H | 294.1448 |
| C47H80NO8P    | M+H | 818.5694 | C39H70O5    | M+H | 619.5296 |
| C48H78NO8P    | M+H | 828.5537 | C42H81NO3   | M+H | 648.6289 |

|              |     |          |              |     |          |
|--------------|-----|----------|--------------|-----|----------|
| C42H81NO3    | M+H | 648.6289 | C43H82NO8P   | M+H | 772.5850 |
| C43H69O8P    | M+H | 745.4802 | C26H42O      | M+H | 371.3308 |
| C16H22O5     | M+H | 295.1540 | C39H68O5     | M+H | 617.5139 |
| C43H73O8P    | M+H | 749.5115 | C29H48O2     | M+H | 429.3727 |
| C41H69O8P    | M+H | 721.4802 | C45H80NO8P   | M+H | 794.5694 |
| C44H84NO7P   | M+H | 770.6058 | C11H16N4O4   | M+H | 269.1244 |
| C25H42O4     | M+H | 407.3155 | C11H16N4O3   | M+H | 253.1295 |
| C41H76NO8P   | M+H | 742.5381 | C47H73O8P    | M+H | 797.5115 |
| C28H48O4     | M+H | 449.3625 | C27H40O2     | M+H | 397.3101 |
| C53H94O6     | M+H | 827.7123 | C15H19N3O2   | M+H | 274.1550 |
| C41H78NO7P   | M+H | 728.5588 | C10H13N4O8P  | M+H | 349.0543 |
| C43H80NO8P   | M+H | 770.5694 | C15H19N3O3   | M+H | 290.1499 |
| C26H46O6     | M+H | 455.3367 | C16H18N3O5   | M+H | 333.1319 |
| C38H77NO3    | M+H | 596.5976 | C43H71O8P    | M+H | 747.4959 |
| C27H40O2     | M+H | 397.3101 | C25H36O3     | M+H | 385.2737 |
| C22H39NO2    | M+H | 350.3053 | C14H20N2O3   | M+H | 265.1546 |
| C39H78NO7P   | M+H | 704.5588 | C14H19N3O2   | M+H | 262.1550 |
| C22H37NO2    | M+H | 348.2897 | C39H78NO7P   | M+H | 704.5588 |
| C13H24N4O3   | M+H | 285.1921 | C42H80NO7P   | M+H | 742.5745 |
| C12H16O6S    | M+H | 289.0740 | C15H23N3O2   | M+H | 278.1863 |
| C47H74O2     | M+H | 671.5761 | C45H73O8P    | M+H | 773.5115 |
| C59H98O6     | M+H | 903.7436 | C25H47NO5    | M+H | 442.3527 |
| C57H96O6     | M+H | 877.7279 | C23H45NO5    | M+H | 416.3370 |
| C23H38O4     | M+H | 379.2842 | C37H69O7P    | M+H | 657.4853 |
| C24H37NO2    | M+H | 372.2897 | C46H86NO8P   | M+H | 812.6163 |
| C26H47NO     | M+H | 390.3730 | C26H47NO     | M+H | 390.3730 |
| C26H40O      | M+H | 369.3152 | C47H76NO8P   | M+H | 814.5381 |
| C46H86NO8P   | M+H | 812.6163 | C18H19NO7    | M+H | 362.1234 |
| C15H12N2O2   | M+H | 253.0971 | C38H74NO8P   | M+H | 704.5224 |
| C50H80NO8P   | M+H | 854.5694 | C22H37NO2    | M+H | 348.2897 |
| C38H78NO7P   | M+H | 692.5588 | C49H100N2O6P | M+H | 844.7391 |
| C37H72NO8P   | M+H | 690.5068 | C37H66O5     | M+H | 591.4983 |
| C49H100N2O6P | M+H | 844.7391 | C38H78NO7P   | M+H | 692.5588 |
| C54H82O4     | M+H | 795.6285 | C14H18N2O3   | M+H | 263.1390 |
| C55H94O6     | M+H | 851.7123 | C23H46NO7P   | M+H | 480.3084 |
| C11H16N4O4   | M+H | 269.1244 | C10H13N5O3   | M+H | 252.1091 |
| C21H41NO4    | M+H | 372.3108 | C21H22O7     | M+H | 387.1438 |
| C11H12BrN5O  | M+H | 310.0298 | C57H104O6    | M+H | 885.7905 |
| C10H13N4O8P  | M+H | 349.0543 | C45H82NO8P   | M+H | 796.5850 |
| C25H45NO4    | M+H | 424.3421 | C53H94O6     | M+H | 827.7123 |
| C45H71O8P    | M+H | 771.4959 | C19H40O3     | M+H | 317.3050 |

|             |     |          |               |     |          |
|-------------|-----|----------|---------------|-----|----------|
| C41H68O5    | M+H | 641.5139 | C19H22O7      | M+H | 363.1438 |
| C11H16N4O3  | M+H | 253.1295 | C32H50O7      | M+H | 547.3629 |
| C43H71O8P   | M+H | 747.4959 | C13H18N2O3    | M+H | 251.1390 |
| C39H76NO7P  | M+H | 702.5432 | C21H23NO7     | M+H | 402.1547 |
| C38H70O4    | M+H | 591.5346 | C42H86NO7P    | M+H | 748.6214 |
| C39H78NO8P  | M+H | 720.5537 | C19H20O7      | M+H | 361.1281 |
| C20H24O7    | M+H | 377.1594 | C26H52NO7P    | M+H | 522.3554 |
| C44H85NO11S | M+H | 836.5916 | C43H73O8P     | M+H | 749.5115 |
| C16H21N3O3S | M+H | 336.1376 | C23H31NO7     | M+H | 434.2173 |
| C45H80NO8P  | M+H | 794.5694 | C48H86NO8P    | M+H | 836.6163 |
| C20H39NO2   | M+H | 326.3053 | C22H39NO      | M+H | 334.3104 |
| C41H70O5    | M+H | 643.5296 | C41H76NO7P    | M+H | 726.5432 |
| C26H56NO6P  | M+H | 510.3918 | C23H43NO4     | M+H | 398.3264 |
| C23H46NO7P  | M+H | 480.3084 | C23H29NO7     | M+H | 432.2016 |
| C29H48O2    | M+H | 429.3727 | C24H37NO2     | M+H | 372.2897 |
| C16H12O9    | M+H | 349.0554 | C14H17N3O3    | M+H | 276.1342 |
| C45H82NO8P  | M+H | 796.5850 | C20H24O7      | M+H | 377.1594 |
| C18H18O6    | M+H | 331.1176 | C20H32N6O12S2 | M+H | 613.1592 |
| C26H50NO7P  | M+H | 520.3397 | C14H22N2O3    | M+H | 267.1703 |
| C41H76NO7P  | M+H | 726.5432 | C21H24O7      | M+H | 389.1594 |
| C35H52O4    | M+H | 537.3938 | C39H81N2O6P   | M+H | 705.5905 |
| C13H20N2O3  | M+H | 253.1546 | C45H71O8P     | M+H | 771.4959 |
| C26H54NO6P  | M+H | 508.3761 | C23H27NO9     | M+H | 462.1758 |
| C45H73O8P   | M+H | 773.5115 | C39H76NO7P    | M+H | 702.5432 |
| C15H10O4    | M+H | 255.0651 | C18H20O7      | M+H | 349.1281 |
| C45H67O8P   | M+H | 767.4646 | C20H23NO6     | M+H | 374.1598 |
| C29H50O2    | M+H | 431.3883 | C43H80NO7P    | M+H | 754.5745 |
| C25H36O3    | M+H | 385.2737 | C18H18O7      | M+H | 347.1125 |
| C23H48NO7P  | M+H | 482.3241 | C14H22N2O2    | M+H | 251.1754 |
| C39H67O8P   | M+H | 695.4646 | C15H14O7      | M+H | 307.0812 |
| C45H76NO7P  | M+H | 774.5432 | C45H76NO7P    | M+H | 774.5432 |
| C37H69O7P   | M+H | 657.4853 | C26H50NO7P    | M+H | 520.3397 |
| C42H86NO7P  | M+H | 748.6214 | C50H80NO8P    | M+H | 854.5694 |
| C43H87N2O6P | M+H | 759.6374 | C16H12O9      | M+H | 349.0554 |
| C27H46O3    | M+H | 419.3519 | C44H74NO8P    | M+H | 776.5224 |
| C42H83NO3   | M+H | 650.6445 | C15H10O4      | M+H | 255.0651 |
| C10H13N5O3  | M+H | 252.1091 | C54H82O4      | M+H | 795.6285 |
| C12H5F6NO2  | M+H | 310.0297 | C18H20O6      | M+H | 333.1332 |
| C14H30N4O2  | M+H | 287.2441 | C17H18O8      | M+H | 351.1074 |
| C51H90O7    | M+H | 815.6759 | C22H28O7      | M+H | 405.1907 |
| C39H81N2O6P | M+H | 705.5905 | C19H21NO6     | M+H | 360.1441 |

|             |     |          |             |     |          |
|-------------|-----|----------|-------------|-----|----------|
| C19H20O7    | M+H | 361.1281 | C42H83NO3   | M+H | 650.6445 |
| C19H40O3    | M+H | 317.3050 | C16H12O4    | M+H | 269.0808 |
| C46H78NO10P | M+H | 836.5436 | C20H18O8    | M+H | 387.1074 |
| C15H10N2O3  | M+H | 267.0764 | C10H16N4O4  | M+H | 257.1244 |
| C21H23NO7   | M+H | 402.1547 | C45H82NO7P  | M+H | 780.5901 |
| C13H17N3O4  | M+H | 280.1291 | C18H18O8    | M+H | 363.1074 |
| C45H74NO8P  | M+H | 788.5224 | C41H68O5    | M+H | 641.5139 |
| C18H20O7    | M+H | 349.1281 | C20H20O7    | M+H | 373.1281 |
| C49H82NO8P  | M+H | 844.5850 | C22H25NO7   | M+H | 416.1703 |
| C41H80NO7P  | M+H | 730.5745 | C45H80NO7P  | M+H | 778.5745 |
| C43H80NO7P  | M+H | 754.5745 | C46H76NO8P  | M+H | 802.5381 |
| C11H15N5O3S | M+H | 298.0968 | C23H39NO    | M+H | 346.3104 |
| C48H86NO8P  | M+H | 836.6163 | C59H100O6   | M+H | 905.7592 |
| C37H66O5    | M+H | 591.4983 | C41H80NO7P  | M+H | 730.5745 |
| C21H44O3    | M+H | 345.3363 | C16H20N2O   | M+H | 257.1648 |
| C48H84NO7P  | M+H | 818.6058 | C41H82NO7P  | M+H | 732.5901 |
| C8H20NO6P   | M+H | 258.1101 | C22H30O2    | M+H | 327.2318 |
| C16H16O7    | M+H | 321.0968 | C18H20FNO3S | M+H | 350.1220 |
| C17H12O4    | M+H | 281.0808 | C43H87N2O6P | M+H | 759.6374 |
| C13H18N2O3  | M+H | 251.1390 | C26H54NO6P  | M+H | 508.3761 |
| C27H40O3    | M+H | 413.3050 | C23H28O7    | M+H | 417.1907 |
| C20H37NO2   | M+H | 324.2897 | C34H69NO3   | M+H | 540.5350 |
| C27H42O4    | M+H | 431.3155 | C42H81NO11S | M+H | 808.5603 |
| C22H25NO7   | M+H | 416.1703 | C48H86NO7P  | M+H | 820.6214 |
| C25H47NO5   | M+H | 442.3527 | C39H74NO7P  | M+H | 700.5275 |
| C52H80NO8P  | M+H | 878.5694 | C41H72NO8P  | M+H | 738.5068 |
| C37H74O13P2 | M+H | 789.4677 | C17H14O4    | M+H | 283.0964 |
| C45H72NO8P  | M+H | 786.5068 | C27H45NO    | M+H | 400.3574 |
| C23H39NO    | M+H | 346.3104 | C32H45NO4   | M+H | 508.3421 |
| C53H92O6    | M+H | 825.6966 | C25H50NO7P  | M+H | 508.3397 |
| C39H74NO7P  | M+H | 700.5275 | C12H16N2O4  | M+H | 253.1182 |
| C53H90O7    | M+H | 839.6759 | C14H17N2O5  | M+H | 294.1210 |
| C41H82NO8P  | M+H | 748.5850 | C15H19N3O4  | M+H | 306.1448 |
| C27H36N2O5  | M+H | 469.2697 | C19H20O8    | M+H | 377.1231 |
| C14H12O6S   | M+H | 309.0427 | C17H18O6    | M+H | 319.1176 |
| C45H80NO7P  | M+H | 778.5745 | C27H42O4    | M+H | 431.3155 |
| C36H68O4    | M+H | 565.5190 | C14H17N3O2  | M+H | 260.1393 |
| C27H45NO2   | M+H | 416.3523 | C53H92O6    | M+H | 825.6966 |
| C18H19NO7   | M+H | 362.1234 | C17H18O7    | M+H | 335.1125 |
| C23H43NO5   | M+H | 414.3214 | C19H24O7    | M+H | 365.1594 |
| C49H84NO8P  | M+H | 846.6007 | C43H82NO7P  | M+H | 756.5901 |



|             |     |          |              |     |          |
|-------------|-----|----------|--------------|-----|----------|
| C14H19N3O4  | M+H | 294.1448 | C10H13N5O4   | M+H | 268.1040 |
| C30H52O4    | M+H | 477.3938 | C37H70O12S   | M+H | 739.4660 |
| C18H20O6    | M+H | 333.1332 | C60H94O6     | M+H | 911.7123 |
| C32H45NO4   | M+H | 508.3421 | C40H74NO8P   | M+H | 728.5224 |
| C24H48NO7P  | M+H | 494.3241 | C41H70O5     | M+H | 643.5296 |
| C41H82NO7P  | M+H | 732.5901 | C20H39NO5    | M+H | 374.2901 |
| C27H45NO    | M+H | 400.3574 | C11H15N5O3S  | M+H | 298.0968 |
| C57H104O6   | M+H | 885.7905 | C25H48NO7P   | M+H | 506.3241 |
| C10H16N4O4  | M+H | 257.1244 | C39H66O5     | M+H | 615.4983 |
| C39H66O5    | M+H | 615.4983 | C25H38O4     | M+H | 403.2842 |
| C47H93O8P   | M+H | 817.6680 | C21H23NO9    | M+H | 434.1445 |
| C19H22O7    | M+H | 363.1438 | C40H78NO7P   | M+H | 716.5588 |
| C57H94O6    | M+H | 875.7123 | C53H90O7     | M+H | 839.6759 |
| C43H82NO7P  | M+H | 756.5901 | C52H80NO8P   | M+H | 878.5694 |
| C28H52NO7P  | M+H | 546.3554 | C44H86NO6P   | M+H | 756.6265 |
| C22H39NO    | M+H | 334.3104 | C14H30N4O2   | M+H | 287.2441 |
| C42H81NO11S | M+H | 808.5603 | C25H32N2O7   | M+H | 473.2282 |
| C23H43NO4   | M+H | 398.3264 | C24H48NO7P   | M+H | 494.3241 |
| C20H22O7    | M+H | 375.1438 | C34H39N3O12S | M+H | 714.2327 |
| C48H86NO7P  | M+H | 820.6214 | C15H23N3O3   | M+H | 294.1812 |
| C34H69NO3   | M+H | 540.5350 | C21H39NO4    | M+H | 370.2951 |
| C20H26O7    | M+H | 379.1751 | C7H14N2O6S   | M+H | 255.0645 |
| C45H82NO7P  | M+H | 780.5901 | C19H19NO6    | M+H | 358.1285 |
| C14H20N2O3  | M+H | 265.1546 | C29H38O4     | M+H | 451.2842 |
| C21H26O7    | M+H | 391.1751 | C46H93N2O6P  | M+H | 801.6844 |
| C40H74NO8P  | M+H | 728.5224 | C24H32O7     | M+H | 433.2220 |
| C40H75NO8   | M+H | 698.5565 | C23H29NO8    | M+H | 448.1966 |
| C14H17N2O5  | M+H | 294.1210 | C45H72NO8P   | M+H | 786.5068 |
| C13H25O7P   | M+H | 325.1410 | C48H84NO7P   | M+H | 818.6058 |
| C44H78NO10P | M+H | 812.5436 | C48H77O10P   | M+H | 845.5327 |
| C44H86NO6P  | M+H | 756.6265 | C49H82NO8P   | M+H | 844.5850 |
| C19H24O7    | M+H | 365.1594 | C14H12O6S    | M+H | 309.0427 |
| C37H64O5    | M+H | 589.4826 | C43H72NO8P   | M+H | 762.5068 |
| C50H84NO8P  | M+H | 858.6007 | C17H25N5O4   | M+H | 364.1979 |
| C24H47NO4   | M+H | 414.3577 | C23H40NO7P   | M+H | 474.2615 |
| C10H14N5O6P | M+H | 332.0754 | C20H37NO2    | M+H | 324.2897 |
| C22H22O11   | M+H | 463.1234 | C20H22O7     | M+H | 375.1438 |
| C23H27NO9   | M+H | 462.1758 | C10H14N5O6P  | M+H | 332.0754 |
| C15H12O4    | M+H | 257.0808 | C43H84NO8P   | M+H | 774.6007 |
| C17H18O7    | M+H | 335.1125 | C18H18O6     | M+H | 331.1176 |
| C16H16O6    | M+H | 305.1019 | C49H84NO8P   | M+H | 846.6007 |

|              |     |          |             |     |          |
|--------------|-----|----------|-------------|-----|----------|
| C34H64O4     | M+H | 537.4877 | C20H26O7    | M+H | 379.1751 |
| C40H78NO7P   | M+H | 716.5588 | C13H26N4O2  | M+H | 271.2128 |
| C41H66O5     | M+H | 639.4983 | C25H43NO4   | M+H | 422.3264 |
| C43H72O5     | M+H | 669.5452 | C21H26O7    | M+H | 391.1751 |
| C39H82N2O6P  | M+H | 706.5983 | C23H30O7    | M+H | 419.2064 |
| C14H17NO7    | M+H | 312.1077 | C46H78NO10P | M+H | 836.5436 |
| C43H84NO8P   | M+H | 774.6007 | C24H42O12   | M+H | 523.2749 |
| C50H78NO8P   | M+H | 852.5537 | C37H40N2O6  | M+H | 609.2959 |
| C37H40N2O6   | M+H | 609.2959 | C23H44NO7P  | M+H | 478.2928 |
| C22H28F2O5   | M+H | 411.1977 | C45H74NO8P  | M+H | 788.5224 |
| C7H14N2O6S   | M+H | 255.0645 | C16H16O6    | M+H | 305.1019 |
| C20H32O4     | M+H | 337.2373 | C17H24N4O3  | M+H | 333.1921 |
| C37H70O12S   | M+H | 739.4660 | C55H102O6   | M+H | 859.7749 |
| C23H44NO7P   | M+H | 478.2928 | C24H40O4    | M+H | 393.2999 |
| C15H23N3O2   | M+H | 278.1863 | C27H40O3    | M+H | 413.3050 |
| C53H98O6     | M+H | 831.7436 | C53H98O6    | M+H | 831.7436 |
| C9H16N2O6S   | M+H | 281.0801 | C19H37O6P   | M+H | 393.2400 |
| C16H12O4     | M+H | 269.0808 | C16H26O8    | M+H | 347.1700 |
| C48H90NO7P   | M+H | 824.6527 | C39H67O8P   | M+H | 695.4646 |
| C10H13N5O4   | M+H | 268.1040 | C21H27NO6   | M+H | 390.1911 |
| C25H38O4     | M+H | 403.2842 | C41H74O12S  | M+H | 791.4973 |
| C14H19N3O2   | M+H | 262.1550 | C42H79NO11S | M+H | 806.5446 |
| C25H48NO7P   | M+H | 506.3241 | C13H18N2O4  | M+H | 267.1339 |
| C50H86NO8P   | M+H | 860.6163 | C35H53O8    | M+H | 602.3813 |
| C10H8O7S     | M+H | 273.0063 | C48H82NO7P  | M+H | 816.5901 |
| C23H31NO7    | M+H | 434.2173 | C37H64O5    | M+H | 589.4826 |
| C47H78NO8P   | M+H | 816.5537 | C21H22O8    | M+H | 403.1387 |
| C18H14O4     | M+H | 295.0964 | C11H21N5O5  | M+H | 304.1615 |
| C38H74NO8P   | M+H | 704.5224 | C50H86NO8P  | M+H | 860.6163 |
| C21H22O7     | M+H | 387.1438 | C9H14N2O7   | M+H | 263.0873 |
| C37H70O5     | M+H | 595.5296 | C43H84NO7P  | M+H | 758.6058 |
| C55H102O6    | M+H | 859.7749 | C16H18O6    | M+H | 307.1176 |
| C17H14O4     | M+H | 283.0964 | C35H70NO8P  | M+H | 664.4911 |
| C23H29NO8    | M+H | 448.1966 | C30H50NO7P  | M+H | 568.3397 |
| C37H68O5     | M+H | 593.5139 | C18H22N2O   | M+H | 283.1805 |
| C17H26N4O2   | M+H | 319.2128 | C14H17N3O4  | M+H | 292.1291 |
| C18H18O7     | M+H | 347.1125 | C39H40O15   | M+H | 749.2440 |
| C47H84NO8P   | M+H | 822.6007 | C27H40O4    | M+H | 429.2999 |
| C15H19N3O3   | M+H | 290.1499 | C24H47NO4   | M+H | 414.3577 |
| C20H21NO7    | M+H | 388.1390 | C17H12O4    | M+H | 281.0808 |
| C14H18N5O11P | M+H | 464.0813 | C18H18FNO2S | M+H | 332.1115 |

|              |     |          |             |     |          |
|--------------|-----|----------|-------------|-----|----------|
| C16H18N3O5   | M+H | 333.1319 | C41H82NO8P  | M+H | 748.5850 |
| C21H43O6P    | M+H | 423.2870 | C50H84NO8P  | M+H | 858.6007 |
| C40H60O4     | M+H | 605.4564 | C19H24O6    | M+H | 349.1645 |
| C46H81O10P   | M+H | 825.5640 | C14H17NO7   | M+H | 312.1077 |
| C16H18O6     | M+H | 307.1176 | C41H82O13P2 | M+H | 845.5303 |
| C13H22N4O8S2 | M+H | 427.0951 | C18H14O4    | M+H | 295.0964 |
| C42H78NO7P   | M+H | 740.5588 | C20H22O8    | M+H | 391.1387 |
| C59H96O6     | M+H | 901.7279 |             |     |          |
| C18H22O8     | M+H | 367.1387 |             |     |          |
| C43H72NO8P   | M+H | 762.5068 |             |     |          |
| C14H22N2O3   | M+H | 267.1703 |             |     |          |
| C26H45NO     | M+H | 388.3574 |             |     |          |
| C42H76NO7P   | M+H | 738.5432 |             |     |          |
| C23H45NO5    | M+H | 416.3370 |             |     |          |
| C26H32O3     | M+H | 393.2424 |             |     |          |
| C11H21N5O3   | M+H | 272.1717 |             |     |          |
| C55H92O6     | M+H | 849.6966 |             |     |          |
| C17H26O4     | M+H | 295.1903 |             |     |          |
| C46H93N2O6P  | M+H | 801.6844 |             |     |          |
| C36H71O8P    | M+H | 663.4959 |             |     |          |
| C36H72NO6P   | M+H | 646.5170 |             |     |          |
| C24H32O7     | M+H | 433.2220 |             |     |          |
| C21H24O7     | M+H | 389.1594 |             |     |          |
| C46H88NO8P   | M+H | 814.6320 |             |     |          |
| C43H66O5     | M+H | 663.4983 |             |     |          |
| C43H85NO8    | M+H | 744.6348 |             |     |          |
| C16H10O5     | M+H | 283.0601 |             |     |          |
| C8H16NO3PS2  | M+H | 270.0382 |             |     |          |
| C16H13NO4    | M+H | 284.0917 |             |     |          |
| C26H32O4     | M+H | 409.2373 |             |     |          |
| C29H38O4     | M+H | 451.2842 |             |     |          |
| C15H19N3O2   | M+H | 274.1550 |             |     |          |
| C21H20O11    | M+H | 449.1078 |             |     |          |
| C16H24N3O8   | M+H | 387.1636 |             |     |          |
| C22H30O2     | M+H | 327.2318 |             |     |          |
| C20H18O7S    | M+H | 403.0846 |             |     |          |
| C25H50NO7P   | M+H | 508.3397 |             |     |          |
| C15H31O7P    | M+H | 355.1880 |             |     |          |
| C43H70O5     | M+H | 667.5296 |             |     |          |
| C48H77O10P   | M+H | 845.5327 |             |     |          |
| C21H37O6P    | M+H | 417.2400 |             |     |          |

|             |     |          |
|-------------|-----|----------|
| C14H18N2O3  | M+H | 263.1390 |
| C38H75NO3   | M+H | 594.5819 |
| C26H48NO7P  | M+H | 518.3241 |
| C44H78NO7P  | M+H | 764.5588 |
| C48H76NO8P  | M+H | 826.5381 |
| C16H20N2O   | M+H | 257.1648 |
| C48H82NO7P  | M+H | 816.5901 |
| C41H76NO10P | M+H | 774.5279 |
| C22H28O7    | M+H | 405.1907 |
| C47H86O6    | M+H | 747.6497 |
| C19H22O6    | M+H | 347.1489 |
| C45H84NO8P  | M+H | 798.6007 |
| C27H38O2    | M+H | 395.2944 |
| C16H14O4    | M+H | 271.0964 |
| C33H64O3    | M+H | 509.4928 |
| C21H41O6P   | M+H | 421.2713 |
| C9H14N2O7   | M+H | 263.0873 |
| C26H42O3    | M+H | 403.3206 |
| C44H88NO7P  | M+H | 774.6371 |
| C24H41NO2   | M+H | 376.3210 |

35

36 **Supplementary Table 2.** Putative elemental compositions annotated in METASPACE  
37 (<https://metaspace2020.eu/project/Khodjanizyazova-2019-bones>) using LipidMaps database.

38

| Healthy    |        |            | Stroke      |        |            |
|------------|--------|------------|-------------|--------|------------|
| Formula    | Adduct | <i>m/z</i> | Formula     | Adduct | <i>m/z</i> |
| C27H44     | M+H    | 369.3515   | C27H44      | M+H    | 369.3515   |
| C26H50O4   | M+H    | 427.3781   | C40H80NO8P  | M+H    | 734.5694   |
| C26H50O4   | M+Na   | 449.3601   | C37H68O4    | M+H    | 577.5190   |
| C40H80NO8P | M+H    | 734.5694   | C20H32O2    | M+H    | 305.2475   |
| C19H38O2   | M+H    | 299.2944   | C40H82NO7P  | M+H    | 720.5901   |
| C18H36O2   | M+H    | 285.2788   | C42H82NO8P  | M+H    | 760.5850   |
| C37H68O4   | M+H    | 577.5190   | C27H44O     | M+H    | 385.3465   |
| C20H32O2   | M+H    | 305.2475   | C26H50O4    | M+H    | 427.3781   |
| C18H32O    | M+H    | 265.2526   | C48H84NO8P  | M+H    | 834.6007   |
| C40H82NO7P | M+H    | 720.5901   | C35H66O4    | M+H    | 551.5033   |
| C27H44O    | M+H    | 385.3465   | C39H79N2O6P | M+H    | 703.5748   |
| C18H34O2   | M+H    | 283.2631   | C45H78NO8P  | M+H    | 792.5537   |
| C30H50     | M+H    | 411.3985   | C39H70O4    | M+H    | 603.5346   |
| C26H50O4   | M+K    | 465.3340   | C34H67NO2   | M+H    | 522.5244   |
| C39H70O4   | M+H    | 603.5346   | C23H36O4    | M+Na   | 399.2505   |

|             |      |          |             |     |          |
|-------------|------|----------|-------------|-----|----------|
| C45H78NO8P  | M+H  | 792.5537 | C37H71O8P   | M+K | 713.4518 |
| C35H66O4    | M+H  | 551.5033 | C30H50      | M+H | 411.3985 |
| C42H82NO8P  | M+H  | 760.5850 | C24H50NO7P  | M+H | 496.3397 |
| C39H79N2O6P | M+H  | 703.5748 | C24H48NO6P  | M+H | 478.3292 |
| C22H26O6    | M+K  | 425.1361 | C22H32O2    | M+H | 329.2475 |
| C18H30O     | M+H  | 263.2369 | C23H45NO4   | M+H | 400.3421 |
| C19H36O3    | M+H  | 313.2737 | C46H80NO8P  | M+H | 806.5694 |
| C25H22O5    | M+Na | 425.1359 | C44H80NO8P  | M+H | 782.5694 |
| C18H34O4    | M+H  | 315.2529 | C46H84NO8P  | M+H | 810.6007 |
| C24H50NO7P  | M+H  | 496.3397 | C43H74NO8P  | M+H | 764.5224 |
| C29H46O3    | M+Na | 465.3339 | C37H74NO8P  | M+H | 692.5224 |
| C48H84NO8P  | M+H  | 834.6007 | C27H44O2    | M+H | 401.3414 |
| C43H71O8P   | M+Na | 769.4778 | C42H81NO2   | M+H | 632.6340 |
| C22H32O2    | M+H  | 329.2475 | C37H66O4    | M+H | 575.5033 |
| C29H47NO4   | M+Na | 496.3397 | C27H42O     | M+H | 383.3308 |
| C41H83N2O6P | M+H  | 731.6061 | C42H84NO7P  | M+H | 746.6058 |
| C24H48NO6P  | M+H  | 478.3292 | C29H48O3    | M+H | 445.3676 |
| C34H67NO2   | M+H  | 522.5244 | C25H47NO4   | M+H | 426.3577 |
| C22H45NO    | M+H  | 340.3574 | C30H48      | M+H | 409.3828 |
| C43H74NO8P  | M+H  | 764.5224 | C42H80NO8P  | M+H | 758.5694 |
| C37H71O8P   | M+K  | 713.4518 | C26H54NO7P  | M+H | 524.3710 |
| C20H30O2    | M+H  | 303.2318 | C22H34O2    | M+H | 331.2631 |
| C37H66O4    | M+H  | 575.5033 | C38H76NO8P  | M+H | 706.5381 |
| C46H80NO8P  | M+H  | 806.5694 | C20H30O2    | M+H | 303.2318 |
| C26H54NO7P  | M+H  | 524.3710 | C40H78NO8P  | M+H | 732.5537 |
| C42H84NO7P  | M+H  | 746.6058 | C43H78NO8P  | M+H | 768.5537 |
| C37H74NO8P  | M+H  | 692.5224 | C41H83N2O6P | M+H | 731.6061 |
| C46H84NO8P  | M+H  | 810.6007 | C44H82NO7P  | M+H | 768.5901 |
| C27H44O2    | M+H  | 401.3414 | C27H46O2    | M+H | 403.3570 |
| C44H80NO8P  | M+H  | 782.5694 | C44H84NO8P  | M+H | 786.6007 |
| C29H57NO4   | M+H  | 484.4360 | C27H42O2    | M+H | 399.3257 |
| C22H34O2    | M+H  | 331.2631 | C47H93N2O6P | M+H | 813.6844 |
| C28H44F2O3  | M+H  | 467.3331 | C30H52O5    | M+H | 493.3887 |
| C27H46O2    | M+H  | 403.3570 | C35H62O4    | M+H | 547.4720 |
| C27H42O     | M+H  | 383.3308 | C18H35NO    | M+H | 282.2791 |
| C21H40O3    | M+H  | 341.3050 | C41H74NO7P  | M+H | 724.5275 |
| C42H81NO2   | M+H  | 632.6340 | C42H82NO7P  | M+H | 744.5901 |
| C42H80NO8P  | M+H  | 758.5694 | C43H74NO7P  | M+H | 748.5275 |
| C23H45NO4   | M+H  | 400.3421 | C42H78NO8P  | M+H | 756.5537 |
| C35H62O4    | M+H  | 547.4720 | C39H74NO8P  | M+H | 716.5224 |
| C44H82NO7P  | M+H  | 768.5901 | C46H84NO7P  | M+H | 794.6058 |

|             |     |          |             |     |          |
|-------------|-----|----------|-------------|-----|----------|
| C43H78NO8P  | M+H | 768.5537 | C46H82NO8P  | M+H | 808.5850 |
| C18H35NO    | M+H | 282.2791 | C22H35NO2   | M+H | 346.2740 |
| C44H84NO8P  | M+H | 786.6007 | C43H70O4    | M+H | 651.5346 |
| C16H27F3O2  | M+H | 309.2036 | C43H78NO7P  | M+H | 752.5588 |
| C40H78NO8P  | M+H | 732.5537 | C41H78NO8P  | M+H | 744.5537 |
| C47H93N2O6P | M+H | 813.6844 | C44H78NO8P  | M+H | 780.5537 |
| C38H76NO8P  | M+H | 706.5381 | C46H78NO8P  | M+H | 804.5537 |
| C20H35NO2   | M+H | 322.2740 | C48H82NO8P  | M+H | 832.5850 |
| C20H30O     | M+H | 287.2369 | C25H46NO6P  | M+H | 488.3135 |
| C43H74NO7P  | M+H | 748.5275 | C21H39O6P   | M+H | 419.2557 |
| C29H48O3    | M+H | 445.3676 | C36H71NO3   | M+H | 566.5506 |
| C42H78NO8P  | M+H | 756.5537 | C45H69O8P   | M+H | 769.4802 |
| C42H82NO7P  | M+H | 744.5901 | C21H40O3    | M+H | 341.3050 |
| C34H67NO3   | M+H | 538.5193 | C26H52NO6P  | M+H | 506.3605 |
| C27H42O2    | M+H | 399.3257 | C45H74NO7P  | M+H | 772.5275 |
| C46H82NO8P  | M+H | 808.5850 | C39H76NO8P  | M+H | 718.5381 |
| C43H70O4    | M+H | 651.5346 | C22H36O2    | M+H | 333.2788 |
| C21H39O6P   | M+H | 419.2557 | C47H91N2O6P | M+H | 811.6687 |
| C34H65NO3   | M+H | 536.5037 | C43H76NO8P  | M+H | 766.5381 |
| C21H42O4    | M+H | 359.3155 | C27H51NO4   | M+H | 454.3890 |
| C44H78NO8P  | M+H | 780.5537 | C44H76NO8P  | M+H | 778.5381 |
| C39H74NO8P  | M+H | 716.5224 | C23H48NO7P  | M+H | 482.3241 |
| C44H82NO8P  | M+H | 784.5850 | C39H71O7P   | M+H | 683.5010 |
| C46H78NO8P  | M+H | 804.5537 | C28H50O5    | M+H | 467.3731 |
| C48H82NO8P  | M+H | 832.5850 | C25H45NO2   | M+H | 392.3523 |
| C24H40O4    | M+H | 393.2999 | C44H82NO8P  | M+H | 784.5850 |
| C39H76NO8P  | M+H | 718.5381 | C39H69O8P   | M+H | 697.4802 |
| C46H84NO7P  | M+H | 794.6058 | C55H98O6    | M+H | 855.7436 |
| C21H40O4    | M+H | 357.2999 | C41H80NO8P  | M+H | 746.5694 |
| C57H100O6   | M+H | 881.7592 | C45H76NO8P  | M+H | 790.5381 |
| C47H91N2O6P | M+H | 811.6687 | C45H91N2O6P | M+H | 787.6687 |
| C41H74NO7P  | M+H | 724.5275 | C40H80NO7P  | M+H | 718.5745 |
| C43H78NO7P  | M+H | 752.5588 | C25H49NO4   | M+H | 428.3734 |
| C45H74NO7P  | M+H | 772.5275 | C20H35NO2   | M+H | 322.2740 |
| C30H48      | M+H | 409.3828 | C42H84NO8P  | M+H | 762.6007 |
| C41H78NO8P  | M+H | 744.5537 | C34H65NO3   | M+H | 536.5037 |
| C39H69O8P   | M+H | 697.4802 | C27H49NO2   | M+H | 420.3836 |
| C55H98O6    | M+H | 855.7436 | C41H74NO8P  | M+H | 740.5224 |
| C25H46NO6P  | M+H | 488.3135 | C46H86NO7P  | M+H | 796.6214 |
| C24H52NO6P  | M+H | 482.3605 | C26H46O6    | M+H | 455.3367 |
| C22H35NO2   | M+H | 346.2740 | C57H100O6   | M+H | 881.7592 |

|             |     |          |             |     |          |
|-------------|-----|----------|-------------|-----|----------|
| C48H80NO8P  | M+H | 830.5694 | C40H76NO8P  | M+H | 730.5381 |
| C55H100O6   | M+H | 857.7592 | C41H78NO7P  | M+H | 728.5588 |
| C44H76NO8P  | M+H | 778.5381 | C44H86NO7P  | M+H | 772.6214 |
| C39H70O5    | M+H | 619.5296 | C27H44O3    | M+H | 417.3363 |
| C53H96O6    | M+H | 829.7279 | C55H96O6    | M+H | 853.7279 |
| C40H80NO7P  | M+H | 718.5745 | C55H100O6   | M+H | 857.7592 |
| C41H71O8P   | M+H | 723.4959 | C48H80NO8P  | M+H | 830.5694 |
| C43H76NO8P  | M+H | 766.5381 | C27H42O3    | M+H | 415.3206 |
| C28H50O5    | M+H | 467.3731 | C27H46O     | M+H | 387.3621 |
| C45H76NO8P  | M+H | 790.5381 | C41H71O8P   | M+H | 723.4959 |
| C59H102O6   | M+H | 907.7749 | C42H76NO8P  | M+H | 754.5381 |
| C22H36O2    | M+H | 333.2788 | C53H92O7    | M+H | 841.6915 |
| C46H80NO7P  | M+H | 790.5745 | C47H95N2O6P | M+H | 815.7000 |
| C46H86NO7P  | M+H | 796.6214 | C53H96O6    | M+H | 829.7279 |
| C26H52NO6P  | M+H | 506.3605 | C48H78NO8P  | M+H | 828.5537 |
| C45H69O8P   | M+H | 769.4802 | C57H98O6    | M+H | 879.7436 |
| C45H91N2O6P | M+H | 787.6687 | C47H82NO8P  | M+H | 820.5850 |
| C36H73NO3   | M+H | 568.5663 | C23H35NO2   | M+H | 358.2740 |
| C50H82NO8P  | M+H | 856.5850 | C29H50O2    | M+H | 431.3883 |
| C39H71O7P   | M+H | 683.5010 | C18H33NO    | M+H | 280.2635 |
| C22H36O4    | M+H | 365.2686 | C44H80NO7P  | M+H | 766.5745 |
| C27H49NO2   | M+H | 420.3836 | C55H94O6    | M+H | 851.7123 |
| C47H82NO8P  | M+H | 820.5850 | C21H41NO4   | M+H | 372.3108 |
| C27H44O3    | M+H | 417.3363 | C43H76NO7P  | M+H | 750.5432 |
| C26H42O     | M+H | 371.3308 | C44H86NO8P  | M+H | 788.6163 |
| C44H86NO8P  | M+H | 788.6163 | C44H85NO11S | M+H | 836.5916 |
| C55H96O6    | M+H | 853.7279 | C21H40O4    | M+H | 357.2999 |
| C42H84NO8P  | M+H | 762.6007 | C39H78NO8P  | M+H | 720.5537 |
| C27H53NO4   | M+H | 456.4047 | C21H37NO2   | M+H | 336.2897 |
| C25H47NO4   | M+H | 426.3577 | C44H84NO6P  | M+H | 754.6109 |
| C47H76NO8P  | M+H | 814.5381 | C33H67O7P   | M+H | 607.4697 |
| C44H84NO6P  | M+H | 754.6109 | C59H102O6   | M+H | 907.7749 |
| C46H82NO7P  | M+H | 792.5901 | C34H67NO3   | M+H | 538.5193 |
| C41H74NO8P  | M+H | 740.5224 | C47H80NO8P  | M+H | 818.5694 |
| C36H71NO3   | M+H | 566.5506 | C28H48O5    | M+H | 465.3574 |
| C47H73O8P   | M+H | 797.5115 | C37H72NO8P  | M+H | 690.5068 |
| C37H68O3    | M+H | 561.5241 | C45H78NO7P  | M+H | 776.5588 |
| C23H36O3    | M+H | 361.2737 | C46H80NO7P  | M+H | 790.5745 |
| C39H68O5    | M+H | 617.5139 | C57H96O6    | M+H | 877.7279 |
| C47H95N2O6P | M+H | 815.7000 | C47H78NO8P  | M+H | 816.5537 |
| C25H45NO2   | M+H | 392.3523 | C44H84NO7P  | M+H | 770.6058 |

|             |     |          |             |     |          |
|-------------|-----|----------|-------------|-----|----------|
| C53H92O7    | M+H | 841.6915 | C37H68O3    | M+H | 561.5241 |
| C57H102O6   | M+H | 883.7749 | C22H39NO2   | M+H | 350.3053 |
| C40H77NO12S | M+H | 796.5239 | C43H69O8P   | M+H | 745.4802 |
| C44H80NO7P  | M+H | 766.5745 | C41H76NO8P  | M+H | 742.5381 |
| C27H51NO4   | M+H | 454.3890 | C57H102O6   | M+H | 883.7749 |
| C25H49NO4   | M+H | 428.3734 | C43H80NO8P  | M+H | 770.5694 |
| C27H46O     | M+H | 387.3621 | C41H69O8P   | M+H | 721.4802 |
| C41H80NO8P  | M+H | 746.5694 | C59H98O6    | M+H | 903.7436 |
| C21H37NO2   | M+H | 336.2897 | C50H82NO8P  | M+H | 856.5850 |
| C44H86NO7P  | M+H | 772.6214 | C23H36O3    | M+H | 361.2737 |
| C27H42O3    | M+H | 415.3206 | C35H69O7P   | M+H | 633.4853 |
| C42H76NO8P  | M+H | 754.5381 | C46H82NO7P  | M+H | 792.5901 |
| C57H98O6    | M+H | 879.7436 | C39H70O5    | M+H | 619.5296 |
| C40H76NO8P  | M+H | 730.5381 | C42H81NO3   | M+H | 648.6289 |
| C43H76NO7P  | M+H | 750.5432 | C43H82NO8P  | M+H | 772.5850 |
| C26H52NO7P  | M+H | 522.3554 | C26H42O     | M+H | 371.3308 |
| C19H38O4    | M+H | 331.2842 | C39H68O5    | M+H | 617.5139 |
| C45H78NO7P  | M+H | 776.5588 | C29H48O2    | M+H | 429.3727 |
| C42H80NO7P  | M+H | 742.5745 | C45H80NO8P  | M+H | 794.5694 |
| C59H100O6   | M+H | 905.7592 | C26H42O2    | M+H | 387.3257 |
| C43H82NO8P  | M+H | 772.5850 | C47H73O8P   | M+H | 797.5115 |
| C35H69O7P   | M+H | 633.4853 | C45H76NO6P  | M+H | 758.5483 |
| C47H80NO8P  | M+H | 818.5694 | C42H81NO12S | M+H | 824.5552 |
| C48H78NO8P  | M+H | 828.5537 | C27H40O2    | M+H | 397.3101 |
| C42H81NO3   | M+H | 648.6289 | C43H71O8P   | M+H | 747.4959 |
| C43H69O8P   | M+H | 745.4802 | C39H78NO7P  | M+H | 704.5588 |
| C43H73O8P   | M+H | 749.5115 | C42H80NO7P  | M+H | 742.5745 |
| C41H69O8P   | M+H | 721.4802 | C26H40O2    | M+H | 385.3101 |
| C44H84NO7P  | M+H | 770.6058 | C45H73O8P   | M+H | 773.5115 |
| C25H42O4    | M+H | 407.3155 | C25H47NO5   | M+H | 442.3527 |
| C41H76NO8P  | M+H | 742.5381 | C23H45NO5   | M+H | 416.3370 |
| C47H82O7    | M+H | 759.6133 | C37H69O7P   | M+H | 657.4853 |
| C28H48O4    | M+H | 449.3625 | C46H86NO8P  | M+H | 812.6163 |
| C53H94O6    | M+H | 827.7123 | C42H82NO9P  | M+H | 776.5800 |
| C41H78NO7P  | M+H | 728.5588 | C47H76NO8P  | M+H | 814.5381 |
| C43H80NO8P  | M+H | 770.5694 | C34H63NO3   | M+H | 534.4880 |
| C26H46O6    | M+H | 455.3367 | C38H74NO8P  | M+H | 704.5224 |
| C45H76NO6P  | M+H | 758.5483 | C22H37NO2   | M+H | 348.2897 |
| C38H77NO3   | M+H | 596.5976 | C37H66O5    | M+H | 591.4983 |
| C27H40O2    | M+H | 397.3101 | C38H78NO7P  | M+H | 692.5588 |
| C22H39NO2   | M+H | 350.3053 | C23H46NO7P  | M+H | 480.3084 |



|             |     |          |             |     |          |
|-------------|-----|----------|-------------|-----|----------|
| C39H78NO7P  | M+H | 704.5588 | C21H22O7    | M+H | 387.1438 |
| C22H37NO2   | M+H | 348.2897 | C57H104O6   | M+H | 885.7905 |
| C38H75NO2   | M+H | 578.5870 | C45H82NO8P  | M+H | 796.5850 |
| C47H74O2    | M+H | 671.5761 | C53H94O6    | M+H | 827.7123 |
| C59H98O6    | M+H | 903.7436 | C19H40O3    | M+H | 317.3050 |
| C57H96O6    | M+H | 877.7279 | C19H22O7    | M+H | 363.1438 |
| C28H60NO6P  | M+H | 538.4231 | C32H50O7    | M+H | 547.3629 |
| C23H38O4    | M+H | 379.2842 | C37H71O7P   | M+H | 659.5010 |
| C24H37NO2   | M+H | 372.2897 | C42H86NO7P  | M+H | 748.6214 |
| C46H86NO8P  | M+H | 812.6163 | C19H20O7    | M+H | 361.1281 |
| C33H67O7P   | M+H | 607.4697 | C26H52NO7P  | M+H | 522.3554 |
| C34H63NO3   | M+H | 534.4880 | C41H73O7P   | M+H | 709.5166 |
| C50H80NO8P  | M+H | 854.5694 | C43H73O8P   | M+H | 749.5115 |
| C38H78NO7P  | M+H | 692.5588 | C41H71O7P   | M+H | 707.5010 |
| C37H72NO8P  | M+H | 690.5068 | C40H77NO12S | M+H | 796.5239 |
| C54H82O4    | M+H | 795.6285 | C48H86NO8P  | M+H | 836.6163 |
| C24H50NO8P  | M+H | 512.3346 | C41H76NO7P  | M+H | 726.5432 |
| C55H94O6    | M+H | 851.7123 | C23H43NO4   | M+H | 398.3264 |
| C36H64O4    | M+H | 561.4877 | C24H37NO2   | M+H | 372.2897 |
| C21H41NO4   | M+H | 372.3108 | C23H41O6P   | M+H | 445.2713 |
| C25H45NO4   | M+H | 424.3421 | C25H45O4P   | M+H | 441.3128 |
| C45H71O8P   | M+H | 771.4959 | C20H24O7    | M+H | 377.1594 |
| C42H81NO12S | M+H | 824.5552 | C46H80NO9P  | M+H | 822.5643 |
| C48H93O12P  | M+H | 893.6477 | C53H94O7    | M+H | 843.7072 |
| C41H68O5    | M+H | 641.5139 | C21H24O7    | M+H | 389.1594 |
| C41H73O7P   | M+H | 709.5166 | C39H81N2O6P | M+H | 705.5905 |
| C43H71O8P   | M+H | 747.4959 | C45H71O8P   | M+H | 771.4959 |
| C39H76NO7P  | M+H | 702.5432 | C35H67O7P   | M+H | 631.4697 |
| C39H78NO8P  | M+H | 720.5537 | C39H76NO7P  | M+H | 702.5432 |
| C19H35NO2   | M+H | 310.2740 | C18H20O7    | M+H | 349.1281 |
| C38H68O4    | M+H | 589.5190 | C43H80NO7P  | M+H | 754.5745 |
| C20H24O7    | M+H | 377.1594 | C18H18O7    | M+H | 347.1125 |
| C44H85NO11S | M+H | 836.5916 | C15H14O7    | M+H | 307.0812 |
| C45H80NO8P  | M+H | 794.5694 | C45H76NO7P  | M+H | 774.5432 |
| C20H39NO2   | M+H | 326.3053 | C26H50NO7P  | M+H | 520.3397 |
| C41H70O5    | M+H | 643.5296 | C50H80NO8P  | M+H | 854.5694 |
| C57H94O7    | M+H | 891.7072 | C44H74NO8P  | M+H | 776.5224 |
| C26H56NO6P  | M+H | 510.3918 | C15H10O4    | M+H | 255.0651 |
| C23H46NO7P  | M+H | 480.3084 | C54H82O4    | M+H | 795.6285 |
| C35H67O7P   | M+H | 631.4697 | C18H20O6    | M+H | 333.1332 |
| C29H48O2    | M+H | 429.3727 | C23H41NO2   | M+H | 364.3210 |

|             |     |          |             |     |          |
|-------------|-----|----------|-------------|-----|----------|
| C45H82NO8P  | M+H | 796.5850 | C39H80NO7P  | M+H | 706.5745 |
| C18H18O6    | M+H | 331.1176 | C22H28O7    | M+H | 405.1907 |
| C26H50NO7P  | M+H | 520.3397 | C42H83NO3   | M+H | 650.6445 |
| C41H76NO7P  | M+H | 726.5432 | C16H12O4    | M+H | 269.0808 |
| C44H81NO7   | M+H | 736.6085 | C44H76NO9P  | M+H | 794.5330 |
| C41H71O7P   | M+H | 707.5010 | C39H69O7P   | M+H | 681.4853 |
| C26H54NO6P  | M+H | 508.3761 | C20H18O8    | M+H | 387.1074 |
| C45H73O8P   | M+H | 773.5115 | C45H82NO7P  | M+H | 780.5901 |
| C15H10O4    | M+H | 255.0651 | C18H18O8    | M+H | 363.1074 |
| C45H67O8P   | M+H | 767.4646 | C41H68O5    | M+H | 641.5139 |
| C29H50O2    | M+H | 431.3883 | C28H54NO8P  | M+H | 564.3659 |
| C29H46F2O3  | M+H | 481.3487 | C20H20O7    | M+H | 373.1281 |
| C23H48NO7P  | M+H | 482.3241 | C45H80NO7P  | M+H | 778.5745 |
| C39H67O8P   | M+H | 695.4646 | C27H32F6O3  | M+H | 519.2328 |
| C42H82NO9P  | M+H | 776.5800 | C46H76NO8P  | M+H | 802.5381 |
| C49H93O14P  | M+H | 937.6375 | C48H97O9P   | M+H | 849.6943 |
| C45H76NO7P  | M+H | 774.5432 | C23H39NO    | M+H | 346.3104 |
| C37H69O7P   | M+H | 657.4853 | C27H52NO8P  | M+H | 550.3503 |
| C42H86NO7P  | M+H | 748.6214 | C59H100O6   | M+H | 905.7592 |
| C23H38O3    | M+H | 363.2893 | C41H80NO7P  | M+H | 730.5745 |
| C43H87N2O6P | M+H | 759.6374 | C41H82NO7P  | M+H | 732.5901 |
| C27H46O3    | M+H | 419.3519 | C43H87N2O6P | M+H | 759.6374 |
| C22H30O     | M+H | 311.2369 | C26H54NO6P  | M+H | 508.3761 |
| C42H83NO3   | M+H | 650.6445 | C34H69NO3   | M+H | 540.5350 |
| C51H90O7    | M+H | 815.6759 | C42H81NO11S | M+H | 808.5603 |
| C27H49NO4   | M+H | 452.3734 | C37H67O7P   | M+H | 655.4697 |
| C39H81N2O6P | M+H | 705.5905 | C29H40O4    | M+H | 453.2999 |
| C37H71O7P   | M+H | 659.5010 | C31H59O12P  | M+H | 655.3817 |
| C19H20O7    | M+H | 361.1281 | C48H86NO7P  | M+H | 820.6214 |
| C19H40O3    | M+H | 317.3050 | C39H74NO7P  | M+H | 700.5275 |
| C37H76NO7P  | M+H | 678.5432 | C41H72NO8P  | M+H | 738.5068 |
| C46H78NO10P | M+H | 836.5436 | C17H14O4    | M+H | 283.0964 |
| C23H41O6P   | M+H | 445.2713 | C27H45NO    | M+H | 400.3574 |
| C50H99O10P  | M+H | 891.7048 | C25H50NO7P  | M+H | 508.3397 |
| C25H20O7    | M+H | 433.1281 | C29H46F2O3  | M+H | 481.3487 |
| C45H74NO8P  | M+H | 788.5224 | C19H20O8    | M+H | 377.1231 |
| C18H20O7    | M+H | 349.1281 | C17H18O6    | M+H | 319.1176 |
| C49H82NO8P  | M+H | 844.5850 | C27H42O4    | M+H | 431.3155 |
| C41H80NO7P  | M+H | 730.5745 | C53H92O6    | M+H | 825.6966 |
| C43H80NO7P  | M+H | 754.5745 | C29H49NO4   | M+H | 476.3734 |
| C48H86NO8P  | M+H | 836.6163 | C17H18O7    | M+H | 335.1125 |

|            |     |          |             |     |          |
|------------|-----|----------|-------------|-----|----------|
| C37H66O5   | M+H | 591.4983 | C19H24O7    | M+H | 365.1594 |
| C21H44O3   | M+H | 345.3363 | C43H82NO7P  | M+H | 756.5901 |
| C48H84NO7P | M+H | 818.6058 | C19H35NO2   | M+H | 310.2740 |
| C27H47NO2  | M+H | 418.3679 | C37H76NO7P  | M+H | 678.5432 |
| C16H16O7   | M+H | 321.0968 | C60H94O6    | M+H | 911.7123 |
| C45H78NO6P | M+H | 760.5639 | C40H74NO8P  | M+H | 728.5224 |
| C17H12O4   | M+H | 281.0808 | C41H70O5    | M+H | 643.5296 |
| C27H40O3   | M+H | 413.3050 | C39H72O3    | M+H | 589.5554 |
| C20H37NO2  | M+H | 324.2897 | C25H48NO7P  | M+H | 506.3241 |
| C27H42O4   | M+H | 431.3155 | C39H66O5    | M+H | 615.4983 |
| C25H47NO5  | M+H | 442.3527 | C25H38O4    | M+H | 403.2842 |
| C52H80NO8P | M+H | 878.5694 | C40H78NO7P  | M+H | 716.5588 |
| C45H72NO8P | M+H | 786.5068 | C53H90O7    | M+H | 839.6759 |
| C27H52NO8P | M+H | 550.3503 | C52H80NO8P  | M+H | 878.5694 |
| C23H39NO   | M+H | 346.3104 | C44H86NO6P  | M+H | 756.6265 |
| C53H92O6   | M+H | 825.6966 | C27H47NO2   | M+H | 418.3679 |
| C39H74NO7P | M+H | 700.5275 | C24H48NO7P  | M+H | 494.3241 |
| C53H90O7   | M+H | 839.6759 | C21H39NO4   | M+H | 370.2951 |
| C41H82NO8P | M+H | 748.5850 | C31H60NO8P  | M+H | 606.4129 |
| C45H80NO7P | M+H | 778.5745 | C46H93N2O6P | M+H | 801.6844 |
| C36H68O4   | M+H | 565.5190 | C22H30O     | M+H | 311.2369 |
| C26H42O2   | M+H | 387.3257 | C45H72NO8P  | M+H | 786.5068 |
| C17H28O8   | M+H | 361.1857 | C48H84NO7P  | M+H | 818.6058 |
| C27H45NO2  | M+H | 416.3523 | C48H93O12P  | M+H | 893.6477 |
| C23H43NO5  | M+H | 414.3214 | C41H66O3    | M+H | 607.5084 |
| C26H40O2   | M+H | 385.3101 | C48H77O10P  | M+H | 845.5327 |
| C49H84NO8P | M+H | 846.6007 | C28H36N2O7  | M+H | 513.2595 |
| C18H20O6   | M+H | 333.1332 | C49H82NO8P  | M+H | 844.5850 |
| C24H48NO7P | M+H | 494.3241 | C43H72NO8P  | M+H | 762.5068 |
| C41H82NO7P | M+H | 732.5901 | C47H82O7    | M+H | 759.6133 |
| C27H45NO   | M+H | 400.3574 | C38H77N2O6P | M+H | 689.5592 |
| C57H104O6  | M+H | 885.7905 | C23H40NO7P  | M+H | 474.2615 |
| C27H43NO3  | M+H | 430.3315 | C21H35NO    | M+H | 318.2791 |
| C33H58O4   | M+H | 519.4407 | C16H24O8    | M+H | 345.1544 |
| C39H66O5   | M+H | 615.4983 | C20H37NO2   | M+H | 324.2897 |
| C47H93O8P  | M+H | 817.6680 | C20H22O7    | M+H | 375.1438 |
| C39H80NO7P | M+H | 706.5745 | C43H84NO8P  | M+H | 774.6007 |
| C19H22O7   | M+H | 363.1438 | C18H18O6    | M+H | 331.1176 |
| C57H94O6   | M+H | 875.7123 | C49H84NO8P  | M+H | 846.6007 |
| C43H82NO7P | M+H | 756.5901 | C20H26O7    | M+H | 379.1751 |
| C28H52NO7P | M+H | 546.3554 | C29H56NO8P  | M+H | 578.3816 |

|             |     |          |             |     |          |
|-------------|-----|----------|-------------|-----|----------|
| C23H41NO2   | M+H | 364.3210 | C25H43NO4   | M+H | 422.3264 |
| C53H94O7    | M+H | 843.7072 | C46H78NO10P | M+H | 836.5436 |
| C42H81NO11S | M+H | 808.5603 | C23H44NO7P  | M+H | 478.2928 |
| C44H81NO8   | M+H | 752.6035 | C45H74NO8P  | M+H | 788.5224 |
| C23H43NO4   | M+H | 398.3264 | C24H39NO2   | M+H | 374.3053 |
| C28H36N2O7  | M+H | 513.2595 | C16H16O6    | M+H | 305.1019 |
| C20H22O7    | M+H | 375.1438 | C55H102O6   | M+H | 859.7749 |
| C48H86NO7P  | M+H | 820.6214 | C24H40O4    | M+H | 393.2999 |
| C34H69NO3   | M+H | 540.5350 | C27H40O3    | M+H | 413.3050 |
| C20H26O7    | M+H | 379.1751 |             |     |          |
| C45H82NO7P  | M+H | 780.5901 |             |     |          |
| C57H100O7   | M+H | 897.7541 |             |     |          |
| C40H74NO8P  | M+H | 728.5224 |             |     |          |
| C40H75NO8   | M+H | 698.5565 |             |     |          |
| C39H72O3    | M+H | 589.5554 |             |     |          |
| C44H78NO10P | M+H | 812.5436 |             |     |          |
| C44H76NO9P  | M+H | 794.5330 |             |     |          |
| C44H86NO6P  | M+H | 756.6265 |             |     |          |
| C19H24O7    | M+H | 365.1594 |             |     |          |
| C55H96O7    | M+H | 869.7228 |             |     |          |
| C37H64O5    | M+H | 589.4826 |             |     |          |
| C50H84NO8P  | M+H | 858.6007 |             |     |          |
| C24H47NO4   | M+H | 414.3577 |             |     |          |
| C23H34O2    | M+H | 343.2631 |             |     |          |
| C22H22O11   | M+H | 463.1234 |             |     |          |
| C15H12O4    | M+H | 257.0808 |             |     |          |
| C17H18O7    | M+H | 335.1125 |             |     |          |
| C16H16O6    | M+H | 305.1019 |             |     |          |
| C34H64O4    | M+H | 537.4877 |             |     |          |
| C40H78NO7P  | M+H | 716.5588 |             |     |          |
| C41H66O5    | M+H | 639.4983 |             |     |          |
| C43H72O5    | M+H | 669.5452 |             |     |          |
| C37H73O7P   | M+H | 661.5166 |             |     |          |
| C43H84NO8P  | M+H | 774.6007 |             |     |          |
| C44H79O9P   | M+H | 783.5534 |             |     |          |
| C50H78NO8P  | M+H | 852.5537 |             |     |          |
| C33H65O7P   | M+H | 605.4540 |             |     |          |
| C50H97O12P  | M+H | 921.6790 |             |     |          |
| C16H26O5    | M+H | 299.1853 |             |     |          |
| C20H32O4    | M+H | 337.2373 |             |     |          |
| C38H77N2O6P | M+H | 689.5592 |             |     |          |

|            |     |          |
|------------|-----|----------|
| C30H38N2O7 | M+H | 539.2751 |
| C46H80NO6P | M+H | 774.5796 |
| C23H44NO7P | M+H | 478.2928 |
| C53H98O6   | M+H | 831.7436 |
| C16H12O4   | M+H | 269.0808 |
| C48H90NO7P | M+H | 824.6527 |
| C25H38O4   | M+H | 403.2842 |
| C25H48NO7P | M+H | 506.3241 |
| C50H86NO8P | M+H | 860.6163 |
| C47H78NO8P | M+H | 816.5537 |
| C18H14O4   | M+H | 295.0964 |
| C38H74NO8P | M+H | 704.5224 |
| C42H76NO9P | M+H | 770.5330 |
| C21H22O7   | M+H | 387.1438 |
| C37H70O5   | M+H | 595.5296 |
| C31H41NO3  | M+H | 476.3159 |
| C27H32F6O3 | M+H | 519.2328 |
| C34H66O2   | M+H | 507.5135 |
| C55H102O6  | M+H | 859.7749 |
| C17H14O4   | M+H | 283.0964 |
| C37H68O5   | M+H | 593.5139 |
| C28H54NO8P | M+H | 564.3659 |
| C18H18O7   | M+H | 347.1125 |
| C39H69O7P  | M+H | 681.4853 |
| C47H84NO8P | M+H | 822.6007 |
| C43H72NO7P | M+H | 746.5119 |
| C47H91O12P | M+H | 879.6321 |
| C21H43O6P  | M+H | 423.2870 |
| C46H81O10P | M+H | 825.5640 |
| C24H40NO9P | M+H | 518.2513 |
| C27H47NO   | M+H | 402.3730 |
| C42H78NO7P | M+H | 740.5588 |
| C59H96O6   | M+H | 901.7279 |
| C43H72NO8P | M+H | 762.5068 |
| C26H45NO   | M+H | 388.3574 |
| C42H76NO7P | M+H | 738.5432 |
| C23H45NO5  | M+H | 416.3370 |
| C44H84NO9P | M+H | 802.5956 |
| C18H37NO4S | M+H | 364.2516 |
| C55H92O6   | M+H | 849.6966 |
| C43H70NO7P | M+H | 744.4962 |

|             |     |          |
|-------------|-----|----------|
| C46H76NO7P  | M+H | 786.5432 |
| C37H64N2O6  | M+H | 633.4837 |
| C31H54O4    | M+H | 491.4094 |
| C46H93N2O6P | M+H | 801.6844 |
| C36H71O8P   | M+H | 663.4959 |
| C36H72NO6P  | M+H | 646.5170 |
| C23H35NO2   | M+H | 358.2740 |
| C36H67NO8   | M+H | 642.4939 |
| C21H24O7    | M+H | 389.1594 |
| C41H66O3    | M+H | 607.5084 |
| C40H78NO9P  | M+H | 748.5487 |
| C46H88NO8P  | M+H | 814.6320 |
| C45H85O10P  | M+H | 817.5953 |
| C37H67O7P   | M+H | 655.4697 |
| C43H66O5    | M+H | 663.4983 |
| C16H10O5    | M+H | 283.0601 |
| C30H58NO8P  | M+H | 592.3972 |
| C26H32O4    | M+H | 409.2373 |
| C17H10O4    | M+H | 279.0651 |
| C38H76NO9P  | M+H | 722.5330 |
| C21H20O11   | M+H | 449.1078 |
| C29H49NO4   | M+H | 476.3734 |
| C27H38O     | M+H | 379.2995 |
| C42H80NO9P  | M+H | 774.5643 |
| C25H50NO7P  | M+H | 508.3397 |
| C15H31O7P   | M+H | 355.1880 |
| C43H70O5    | M+H | 667.5296 |
| C48H77O10P  | M+H | 845.5327 |
| C39H67O7P   | M+H | 679.4697 |
| C38H75NO3   | M+H | 594.5819 |

39

40
